# Supplementary material for: The role of tRNA and ribosome competition in coupling the expression of different mRNAs in Saccharomyces cerevisiae
Source: PubMed Central journal article supplement — Nucleic Acids Res. 2011 May 9;39(15):6705–14. doi: 10.1093/nar/gkr300 (PMC3159466; doi:10.1093/nar/gkr300), 2011-05-09
Supplement: supp_gkr300_Supplemental_File_S2.pdf [file supp_gkr300_Supplemental_File_S2.pdf]

**Supplemental File S2.** Yeast tRNAs and their abundance.

| tRNA    | Label | Amino Acid | Abundance <sup>a</sup> |
|---------|-------|------------|------------------------|
|         |       |            |                        |
| tA(UGC) | t1    | Ala        | 55351                  |
| tA(AGC) | t2    | Ala        | 121771                 |
| tR(UCU) | t3    | Arg        | 121771                 |
| tR(CCU) | t4    | Arg        | 11070                  |
| tR(CCG) | t5    | Arg        | 11070                  |
| tR(ACG) | t6    | Arg        | 66421                  |
| tN(GUU) | t7    | Asn        | 110701                 |
| tD(GUC) | t8    | Asp        | 177122                 |
| tC(GCA) | t9    | Cys        | 44280                  |
| tQ(UUG) | t10   | Gln        | 88561                  |
| tQ(CUG) | t11   | Gln        | 11070                  |
| tE(CUC) | t43   | Glu        | 22140                  |
| tE(UUC) | t12   | Glu        | 154982                 |
| tG(UCC) | t13   | Gly        | 33210                  |
| tG(CCC) | t14   | Gly        | 22140                  |
| tG(GCC) | t15   | Gly        | 177122                 |
| tH(GUG) | t16   | His        | 77491                  |
| tI(UAU) | t17   | Ile        | 22140                  |
| tI(AAU) | t18   | Ile        | 143911                 |
| tL(UAG) | t19   | Leu        | 33210                  |
| tL(GAG) | t20   | Leu        | 11070                  |

| tRNA    | Label | Amino Acid | Abundance <sup>a</sup> |
|---------|-------|------------|------------------------|
|         |       |            |                        |
| tL(UAA) | t21   | Leu        | 77491                  |
| tL(CAA) | t22   | Leu        | 110701                 |
| tK(UUU) | t23   | Lys        | 77491                  |
| tK(CUU) | t24   | Lys        | 154982                 |
| tM(CAU) | t25   | Met        | 55351                  |
| tF(GAA) | t27   | Phe        | 110701                 |
| tP(AGG) | t28   | Pro        | 22140                  |
| tP(UGG) | t29   | Pro        | 110701                 |
| tS(GCU) | t30   | Ser        | 33210                  |
| tS(UGA) | t31   | Ser        | 33210                  |
| tS(AGA) | t32   | Ser        | 121771                 |
| tS(CGA) | t33   | Ser        | 11070                  |
| tT(UGU) | t34   | Thr        | 44280                  |
| tT(AGU) | t35   | Thr        | 121771                 |
| tT(CGU) | t36   | Thr        | 11070                  |
| tW(CCA) | t37   | Trp        | 66421                  |
| tY(GUA) | t38   | Tyr        | 88561                  |
| tV(UAC) | t39   | Val        | 22140                  |
| tV(AAC) | t40   | Val        | 154982                 |
| tV(CAC) | t41   | Val        | 22140                  |
| eRF1    | t42   | Stop       | 18000                  |

<sup>a</sup> Molecules per cell. Abundance was calculated from a total tRNA abundance in haploid cells of 3 million (1) and the proportion of isogenes that code for a particular mRNA.

**Reference**

(1) Waldron C and Lacroute F (1975). Effect of Growth Rate on the Amounts of Ribosomal and Transfer Ribonucleic Acids in Yeast. *J. Bact.* **122**: 855-865.
