# Supplementary material for: The role of tRNA and ribosome competition in coupling the expression of different mRNAs in Saccharomyces cerevisiae
Source: PubMed Central journal article supplement — Nucleic Acids Res. 2011 May 9;39(15):6705–14. doi: 10.1093/nar/gkr300 (PMC3159466; doi:10.1093/nar/gkr300), 2011-05-09
Supplement: supp_gkr300_Supplemental_File_S3.pdf [file supp_gkr300_Supplemental_File_S3.pdf]

**Supplemental File S3.** Published tRNA recharging parameters.

| Amino acid | Cytoplasmic synthetase gene (yeast) | Abundance (molecules/cell) <sup>a</sup> | $k_{cat}$ value (s <sup>-1</sup> ) | $k_{cat}$ organism     | $k_{cat}$ Ref. |
|------------|-------------------------------------|-----------------------------------------|------------------------------------|------------------------|----------------|
| Arg        | <i>YDR341c</i>                      | 14783                                   | 32.2                               | <i>S. cerevisiae</i>   | (1)            |
| Ile        | <i>ILS1</i>                         | 28565                                   | 0.2                                | <i>S. cerevisiae</i>   | (2)            |
| Leu        | <i>CDC60</i>                        | 72269                                   | 3.4                                | <i>S. cerevisiae</i>   | (2)            |
| Lys        | <i>KRS1</i>                         | 30249                                   | 129.3                              | <i>S. cerevisiae</i>   | (3)            |
| Met        | <i>ARC1/MES1/GUS1</i>               | 33531 <sup>b</sup>                      | 4.5                                | <i>S. cerevisiae</i>   | (4)            |
| Phe        | <i>FRS1/FRS2</i>                    | 5200 <sup>b</sup>                       | 2.3                                | <i>S. cerevisiae</i>   | (5)            |
| Ser        | <i>SES1</i>                         | 45686                                   | 0.6                                | <i>S. cerevisiae</i>   | (6)            |
| Thr        | <i>THS1</i>                         | 29399                                   | 1.28                               | <i>S. cerevisiae</i>   | (7)            |
| Tyr        | <i>TYS1</i>                         | 16433                                   | 5.1                                | <i>S. cerevisiae</i>   | (8)            |
| Val        | <i>VAS1</i>                         | 17665                                   | 3.2                                | <i>S. cerevisiae</i>   | (9)            |
| Pro        | <i>YHR020w</i>                      | 21120                                   | 2                                  | rat                    | (10)           |
| Ala        | <i>ALA1</i>                         | 18525                                   | 1.1                                | <i>E. coli</i>         | (11)           |
| Asp        | <i>DPS1</i>                         | 31570                                   | 0.061                              | <i>T. kodakarensis</i> | (12)           |
| Cys        | <i>YNL247w</i>                      | 19293                                   | 18                                 | <i>M. jannaschii</i>   | (13)           |
| Gln        | <i>GLN4</i>                         | 17263                                   | 2.6                                | <i>E. coli</i>         | (14)           |
| Glu        | <i>ARC1/MES1/GUS1</i>               | 33531 <sup>b</sup>                      | 2.1                                | <i>T. thermophilus</i> | (15)           |
| Gly        | <i>GRS1</i>                         | 49866                                   | 0.5                                | <i>T. thermophilus</i> | (16)           |
| His        | <i>HTS1</i>                         | 12981                                   | 2.6                                | <i>E. coli</i>         | (17)           |
| Trp        | <i>WRS1</i>                         | 10185                                   | 1500                               | <i>E. coli</i>         | (18)           |
| Asn        | <i>DED81</i>                        | 29944                                   | 2.6                                | (median of above)      |                |

<sup>a</sup> From reference (19)

<sup>b</sup> least abundant subunit

1. Fersht, A.R., Gangloff, J. and Dirheimer, G. (1978) Reaction pathway and rate-determining step in the aminoacylation of tRNA<sup>Arg</sup> catalyzed by the arginyl-tRNA synthetase from yeast. *Biochemistry*, **17**, 3740-3746.
2. Englisch, S., Englisch, U., von der Haar, F. and Cramer, F. (1986) The proofreading of hydroxy analogues of leucine and isoleucine by leucyl-tRNA synthetases from *E. coli* and yeast. *Nucleic Acids Res*, **14**, 7529-7539.
3. Freist, W., Sternbach, H. and Cramer, F. (1992) Lysyl-tRNA synthetase from yeast. Discrimination of amino acids by native and phosphorylated species. *Eur J Biochem*, **204**, 1015-1023.
4. Schwob, E., Sanni, A., Fasiolo, F. and Martin, R.P. (1988) Purification of the yeast mitochondrial methionyl-tRNA synthetase. Common and distinctive features of the cytoplasmic and mitochondrial isoenzymes. *Eur J Biochem*, **178**, 235-242.
5. Freist, W., Sternbach, H. and Cramer, F. (1996) Phenylalanyl-tRNA synthetase from yeast and its discrimination of 19 amino acids in aminoacylation of tRNA(Phe)-C-C-A and tRNA(Phe)-C-C-A(3'NH<sub>2</sub>). *Eur J Biochem*, **240**, 526-531.
6. Weygand-Durasevic, I., Lenhard, B., Filipic, S. and Soll, D. (1996) The C-terminal extension of yeast seryl-tRNA synthetase affects stability of the enzyme and its substrate affinity. *J Biol Chem*, **271**, 2455-2461.
7. Freist, W., Sternbach, H. and Cramer, F. (1994) Threonyl-tRNA synthetase from yeast. Discrimination of 19 amino acids in aminoacylation of tRNA(Thr)-C-C-A and tRNA(Thr)-C-C-A(2'NH<sub>2</sub>). *Eur J Biochem*, **220**, 745-752.

8. Freist, W. and Sternbach, H. (1988) Tyrosyl-tRNA synthetase from baker's yeast. Order of substrate addition, discrimination of 20 amino acids in aminoacylation of tRNA<sup>Tyr</sup>-C-C-A and tRNA<sup>Tyr</sup>-C-C-A(3'NH<sub>2</sub>). *Eur J Biochem*, **177**, 425-433.
9. Freist, W. and Cramer, F. (1990) Valyl-tRNA synthetase from yeast. Discrimination between 20 amino acids in aminoacylation of tRNA(Val)-C-C-A and tRNA(Val)-C-C-A(3'NH<sub>2</sub>). *Eur J Biochem*, **191**, 123-129.
10. Ting, S.M., Bogner, P. and Dignam, J.D. (1992) Isolation of prolyl-tRNA synthetase as a free form and as a form associated with glutamyl-tRNA synthetase. *J Biol Chem*, **267**, 17701-17709.
11. Shi, J.P., Francklyn, C., Hill, K. and Schimmel, P. (1990) A nucleotide that enhances the charging of RNA minihelix sequence variants with alanine. *Biochemistry*, **29**, 3621-3626.
12. Feng, L., Tumbula-Hansen, D., Toogood, H. and Soll, D. (2003) Expanding tRNA recognition of a tRNA synthetase by a single amino acid change. *Proc Natl Acad Sci U S A*, **100**, 5676-5681.
13. Hohn, M.J., Park, H.S., O'Donoghue, P., Schnitzbauer, M. and Soll, D. (2006) Emergence of the universal genetic code imprinted in an RNA record. *Proc Natl Acad Sci U S A*, **103**, 18095-18100.
14. Hayase, Y., Jahn, M., Rogers, M.J., Sylvers, L.A., Koizumi, M., Inoue, H., Ohtsuka, E. and Soll, D. (1992) Recognition of bases in Escherichia coli tRNA(Gln) by glutamyl-tRNA synthetase: a complete identity set. *Embo J*, **11**, 4159-4165.
15. Sekine, S., Nureki, O., Shimada, A., Vassylyev, D.G. and Yokoyama, S. (2001) Structural basis for anticodon recognition by discriminating glutamyl-tRNA synthetase. *Nat Struct Biol*, **8**, 203-206.
16. Mazauroic, M.H., Keith, G., Logan, D., Kreutzer, R., Giege, R. and Kern, D. (1998) Glycyl-tRNA synthetase from Thermus thermophilus--wide structural divergence with other prokaryotic glycyl-tRNA synthetases and functional inter-relation with prokaryotic and eukaryotic glycylation systems. *Eur J Biochem*, **251**, 744-757.
17. Arnez, J.G., Augustine, J.G., Moras, D. and Francklyn, C.S. (1997) The first step of aminoacylation at the atomic level in histidyl-tRNA synthetase. *Proc Natl Acad Sci U S A*, **94**, 7144-7149.
18. Chan, K.W. and Koeppe, R.E., 2nd. (1995) Role of lysine-195 in the KMSKS sequence of E. coli tryptophanyl-tRNA synthetase. *FEBS Lett*, **363**, 33-36.
19. von der Haar, T. (2008) A quantitative estimation of the global translational activity in logarithmically growing yeast cells. *BMC Syst Biol*, **2**, 87.
