# Supplementary material for: The role of tRNA and ribosome competition in coupling the expression of different mRNAs in Saccharomyces cerevisiae
Source: PubMed Central journal article supplement — Nucleic Acids Res. 2011 May 9;39(15):6705–14. doi: 10.1093/nar/gkr300 (PMC3159466; doi:10.1093/nar/gkr300), 2011-05-09
Supplement: supp_gkr300_Supplemental_File_S4.pdf [file supp_gkr300_Supplemental_File_S4.pdf]

Supplemental file S4. Firefly luciferase sequence variants.

>StaFLuc

ATGGAAGACGCCAAAAACATAAAGAAAGGCCCGGCCATTCTATCCTCTAGAGGATGGAACCGCTGGAGAGCAA  
CTGCATAAGGCTATGAAGAGATACGCCCTGGTTCTTGAACAATTGCTTTTACAGATGCACATATCGAGGTGAAC  
ATCACGTACGCGGAATACTTCGAAATGTCCGTTCCGTTGGCAGAAGCTATGAAACGATATGGGCTGAATACAAAT  
CACAGAATCGTCGTATGCAGTGAAAACTCTCTTCAATTCTTTATGCCGGTGTGGGCGCGTTATTTATCGGAGTT  
GCAGTTGCGCCCGGAACGACATTTATAATGAACGTGAATTGCTCAACAGTATGAACATTTTCGCAGCCTACCGTA  
GTGTTTGTTCCTCAAAAAGGGGTTGCAAAAATTTTGAACGTGCAAAAAAATTACCAATAATCCAGAAAATTATT  
ATCATGGATTCTAAAACGGATTACCAGGGATTTAGTCGATGTACACGTTTCGTCACATCTCATCTACCTCCCGGT  
TTTAATGAATACGATTTTGTACCAGAGTCTTTGATCGTGACAAAACAATTGCACTGATAATGAATTCCTCTGGA  
TCTACTGGGTTACCTAAGGGTGTGGCCCTTCCGCATAGAACTGCCTGCGTCAGATTTCTCGCATGCCAGAGATCCT  
ATTTTTGGCAATCAAATCATTCCGGATACTGCGATTTTAAAGTGTGTTCCATTCCATCACGGTTTTTGAATGTTT  
ACTACACTCGGATATTTGATATGTGGATTTTCGAGTCGTCTTAATGTATAGATTTGAAGAAGAGCTGTTTTTACGA  
TCCCTTCAGGATTACAAAATTCAAAGTGCCTTGTAGTACCAACCTATTTTCATTCTTCGCCAAAAGCACTCTG  
ATTGACAAATACGATTTTATCTAATTTACACGAAATTGCTTCTGGGGCGCACCTCTTTCGAAAGAAGTCGGGGAA  
GCGGTTGCAAAACGCTTCCATCTTCCAGGGATACGACAAGGATATGGGCTCACTGAGACTACATCAGCTATTCTG  
ATTACACCCGAGGGGATGATAAACCGGGCGCGGTCCGTAAGTTGTTCCATTTTTTGAAGCGAAGGTTGTGGAT  
CTGGATAACGGGAAAACGCTGGGCGTTAATCAGAGAGGCGAATTATGTGTCAGAGGACCTATGATTATGTCCGGT  
TATGTAAACAATCCGGAAGCGACCAACGCTTGTATTGACAAAGGATGGATGGCTACATTTCTGGAGACATAGCTTAC  
TGGGACGAAGACGAACACTTCTTCATAGTTGACCCTTGAAGTCTTTAATTAATAACAAAGGATATCAGGTGGCC  
CCCGCTGAATTGGAATCGATATTGTTACAACACCCCAACATCTTCGACGCGGGCGTGGCAGGCTTTCGCCGACGAT  
GACGCCGGTGAACCTCCCGCCCGCTTGTGTTTTGGAGCACGGAAAAGACGATGACGGAAAAAGAGATCGTGGAT  
TACGTGCGCAGTCAAGTAAACAACCGCGAAAAAGTTGCGCGGAGGAGTTGTGTTTTGTGGACGAAGTACCGAAAGGT  
CTTACC GGAAAACCTCGACGCAAGAAAAATCAGAGAGATCCTCATAAAGGCCAAGAAGGGCGGAAAAGTCAAATGT  
TAA

>MinFLuc

ATGGAGGACGCAAAAAACATAAAAAAGGGCCTGCGCCCTTCTATCCTCTCGAGGATGGGACGGCGGGGGAGCAG  
CTCCATAAAGCGATGAAAAGGTACGCACTCGTGCCTGGGACGATAGCGTTTACGGATGCACATATAGAGGTGAAC  
ATAACGTACGCGGAGTACTTCGAGATGTCCGGTGC GGCTCGCAGAGGCGATGAAACGGTATGGGCTCAATACGAAT  
CACAGGATAGTAGTATGCTCGGAGAACTCGCTCCAGTTCCTTATGCCTGTGCTCGGGGCGCTCTTTATAGGGGTG  
GCAGTGGCGCCCGGAACGACATATATAATGAGCGGGAGCTCCTCAACTCGATGAACATATCGCAGCCTACGGTA  
GTGTTTGTGTCGAAAAAGGGCTCCAGAAAATACTCAACGTGCAGAAAAAACTCCCCATAATACAGAAAATAATA  
ATAATGGATTTCGAAAACGGATTACCAGGGGTTTCAGTCGATGTACACGTTTCGTAACGTCGCATCTCCCTCCCGGG  
TTTAATGAGTACGATTTTGTACCCGAGTCTTTGATCGGGACAAAACGATAGCACTCATAATGAATTCGTCCGGGA  
TCGACGGGGCTCCCTAAAGGGGTGGCACTCCCTCATAGGACGGCATGCGTAAGGTTCTCGCATGCAAGGGACCCCT  
ATATTTGGGAATCAGATAATACCTGATACGGCGATACTCTCGGTGGTGCCCTTCCATCACGGGTTTGGGATGTTT  
ACGACGCTCGGGTATCTCATATGTGGGTTTTCGGGTAGTACTCATGTATAGGTTTGAGGAGGAGCTCTTCTCCGG  
TCGCTCCAGGATTACAAAATACAGTCCGGCGCTCCTCGTACCCACGCTCTTTTCGTTCTTCGAAAATCGACGCTC  
ATAGACAAATACGATCTCTCGAATCTCCACGAGATAGCGTCCGGGGGGGCACCTCTCTCGAAAGAGGTAGGGGAG  
GCGGTGGCAAAACGGTTCCATCTCCCGGGGATACGGCAGGGGTATGGGCTCACGGAGACGACGTCGGCGATACTC  
ATAACGCCCAGGGGGATGATAAACCTGGGGCGGTAGGGAAAAGTGGTGCCCTTTTTTGGAGGCGAAAAGTGGTGGAT  
CTCGATACGGGGAAAACGCTCGGGGTGAATCAGAGGGGGGAGCTCTGTGTAAGGGGGCCTATGATAATGTCCGGG  
TATGTAAACAATCCTGAGGCGACGAACGCACTCATAGACAAAGATGGGTGGTCCATTCCGGGGACATAGCGTAC  
TGGGACGAGGACGAGCACTTCTTCATAGTGGACCGGCTCAAATCGTCTATAAAAATACAAAGGATATCAGGTGGCA  
CCCGCGGAGCTCGAGTCGATACTCCTCCAGCACCCCAACATATTCGACGCGGGGGTGGCAGGGCTCCCGGACGAT  
GACGCGGGGAGCTCCCGCAGCAGTGGTGGTCTCGAGCACGGGAAAACGATGACGGAGAAAGAGATAGTGGAT  
TACGTAGCATCGCAGGTAACGACGGCGAAAAAACTCCGGGGGGGGTGGTGTGTTGTGGACGAGGTACCTAAAGGG

CTCACGGGGAAACTCGACGCAAGGAAAATAAGGGAGATACTCATAAAAAGCAAAAAAGGGGGAAATCGAAACTC  
TAA

>MaxFLuc

ATGGAAGACGCTAAGAACATTAAGAAGGGCCCAGCTCCATTCTACCCATTGGAAGACGGCACTGCTGGCGAACAA  
TTGCACAAGGCTATGAAGAGATACGCTTTGGTTCCAGGCACTATTGCTTTCACTGACGCTCACATTGAAGTTAAC  
ATTACTTACGCTGAATACTTCGAAATGTCTGTTAGATTGGCTGAAGCTATGAAGAGATACGGCTTGAACACTAAC  
CACAGAATTGTTGTTTGTCTGAAAACCTTTTGCAATTCTTCATGCCAGTTTTGGGCGCTTTGTTTCATTGGCGTT  
GCTGTTGCTCCAGCTAACGACATTTACAACGAAAAGAGAATTGTTGAACTCTATGAACATTTCTCAACCAACTGTT  
GTTTTCGTTTTCTAAGAAGGGCTTGCAAAAAGATTTTGAACGTTCAAAAAGAAGTTGCCAATTATTCAAAAAGATTATT  
ATTATGGACTCTAAGACTGACTACCAAGGCTTCCAATCTATGTACACTTTCGTTACTTCTCACTTGCCACCAGGC  
TTCAACGAATACGACTTCGTTCCAGAATCTTTGACAGAGACAAGACTATTGCTTTGATTATGAACTCTTCTGGC  
TCTACTGGCTTGCCAAAGGGCGTTGCTTTGCCACACAGAAGCTGCTTGCGTTAGATTCTCTCACGCTAGAGACCCA  
ATTTTCGGCAACCAAATTATTCCAGACACTGCTATTTTGTCTGTTGTTCCATTCCACCACGGCTTCGGCATGTTT  
ACTACTTTGGGCTACTTGATTTGCGGCTTCAGAGTTGTTTTGATGTACAGATTGGAAGAAGAATTGTTCTTGAGA  
TCTTTGCAAGACTACAAGATTCAATCTGCTTTGTTGGTTCCAACCTTTGTTCTCTTTCTTCGCTAAGTCTACTTTG  
ATTGACAAGTACGACTTGTCTAACTTGCACGAAATTGCTTCTGGCGGCGCTCCATTGTCTAAGGAAGTTGGCGAA  
GCTGTTGCTAAGAGATTCCACTTGCCAGGCATTAGACAAGGCTACGGCTTGACTGAAACTACTTCTGCTATTTTG  
ATTACTCCAGAAGGCGACGACAAGCCAGGCGTGTGGCAAGGTTGTTCCATTCTTCGAAGCTAAGGTTGTTGAC  
TTGGACACTGGCAAGACTTTGGGCGTTAACCAAAAGAGGCGAATTGTGCGTTAGAGGCCCAATGATTATGCTGGC  
TACGTTAAACAACCCAGAAGCTACTAACGCTTTGATTGACAAGGACGGCTGGTTGCACTCTGGCGACATTGCTTAC  
TGGGACGAAGACGAACACTTCTTCATTGTTGACAGATTGAAGTCTTTGATTAAGTACAAGGGCTACCAAGTTGCT  
CCAGCTGAATTGGAATCTATTTTGTGCAACACCCAAACATTTTCGACGCTGGCGTTGCTGGCTTGCCAGACGAC  
GACGCTGGCGAATTGCCAGCTGCTGTTGTTGTTTTGGAACACGGCAAGACTATGACTGAAAAGGAAATTGTTGAC  
TACGTTGCTTCTCAAGTTACTACTGCTAAGAAGTTGAGAGGCGGCGTTGTTTTCGTTGACGAAGTTCCAAAGGGC  
TTGACTGGCAAGTTGGACGCTAGAAAAGATTAGAGAAATTTTGATTAAGGCTAAGAAGGGCGGCAAGTCTAAGTTG  
TAA
