# Supplementary material for: The role of tRNA and ribosome competition in coupling the expression of different mRNAs in Saccharomyces cerevisiae
Source: PubMed Central journal article supplement — Nucleic Acids Res. 2011 May 9;39(15):6705–14. doi: 10.1093/nar/gkr300 (PMC3159466; doi:10.1093/nar/gkr300), 2011-05-09
Supplement: supp_gkr300_Supplemental_File_S5.pdf [file supp_gkr300_Supplemental_File_S5.pdf]

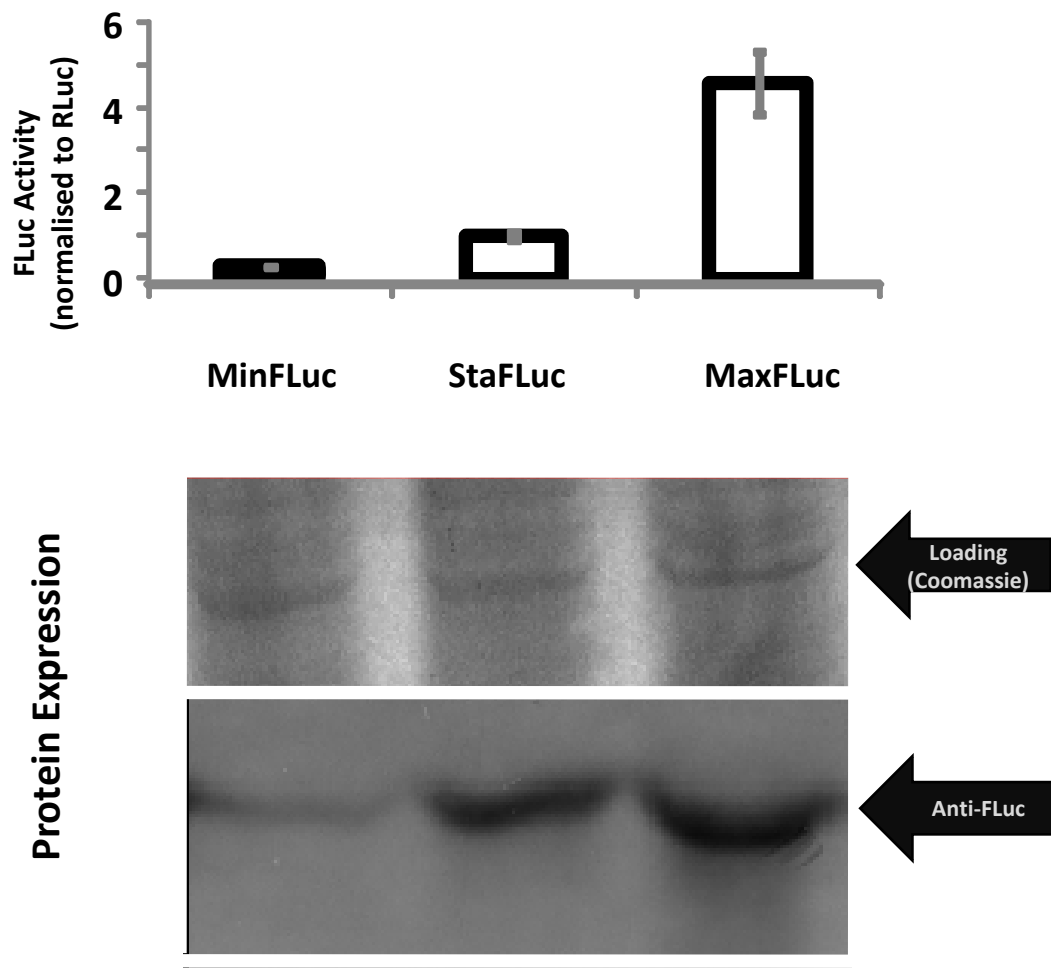

**Supplemental Figure 1.** Gene expression levels from different Firefly luciferase (Fluc) encoding sequences in yeast strain BY4741  $\Delta dom34$ . Top, activity levels as measured by dual-luciferase assay. Bottom, actual protein expression levels as determined in western blots. Both assays indicate a 5-fold change in expression levels between MinFLuc and StaFLuc, and between StaFLuc and MaxFLuc.
